# Supplementary material
Source: Springer Nature journal article supplement (https://www.springermedizin.de/resource/supplementary/12913_2009_936_MOESM1_ESM.pdf/9536502)
Supplement: MOESM1 [file 9536502]

## Stages of the patient

History taking

Physical exam

Lab results

Hospital stay

Discharge

## Stages of the study

Patient presents  
to the hospital  
(inclusion)

Physician notes  
down thoughts on  
differential diagnosis

Medical record  
review by  
expert internist

Interview with physician  
and classification of  
suboptimal acts

Measurement  
of personal  
and  
circumstantial  
factors during  
the diagnostic  
process
